# Supplementary material for: Enhanced hydrogen production under a visible light source and dye degradation under natural sunlight using nanostructured doped zinc orthotitanates
Source: Royal Society of Chemistry journal article supplement (doi:10.1039/c4nj01995d), 2015-01-01
Supplement: c4nj01995d1.pdf [file c4nj01995d1.pdf]

## Enhanced hydrogen production under visible light source and dye degradation under natural sunlight using nanostructured doped zinc orthotitanates

Latesh Nikam<sup>a,b</sup>, Rajendra Panmand<sup>a</sup>, Sunil Kadam<sup>a</sup>, Sonali Naik<sup>a</sup> and Bharat Kale<sup>a\*</sup>

### Supporting Information

#### S1 JCPDS Data

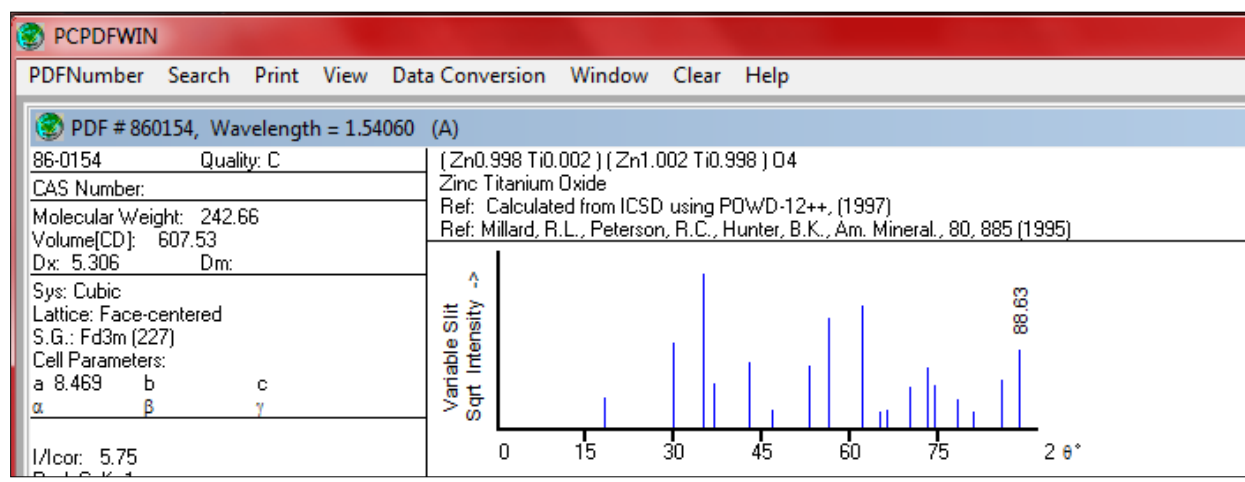

Fig 1 JCPDS data of Zn<sub>2</sub>TiO<sub>4</sub> (cubic) [ 86-0154]

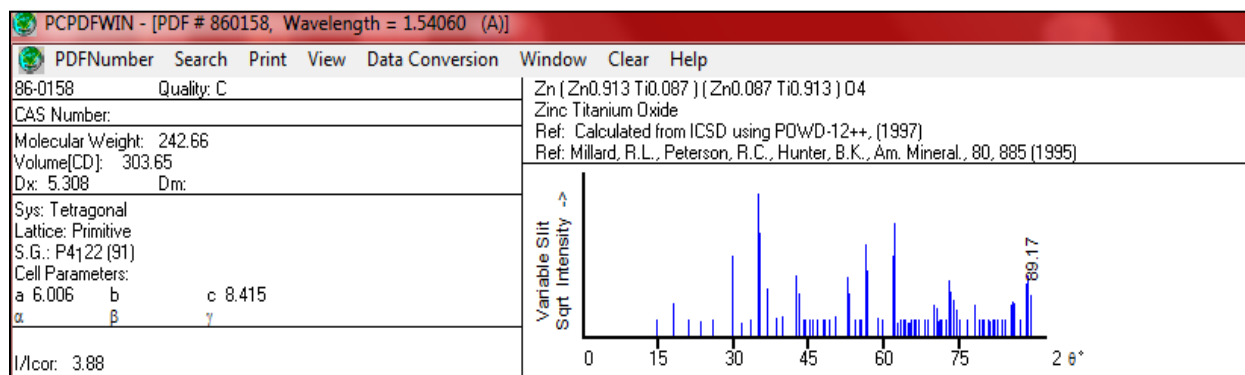

Fig 2 JCPDS data of Zn<sub>2</sub>TiO<sub>4</sub> (Tetragonal) [ 86-0158]

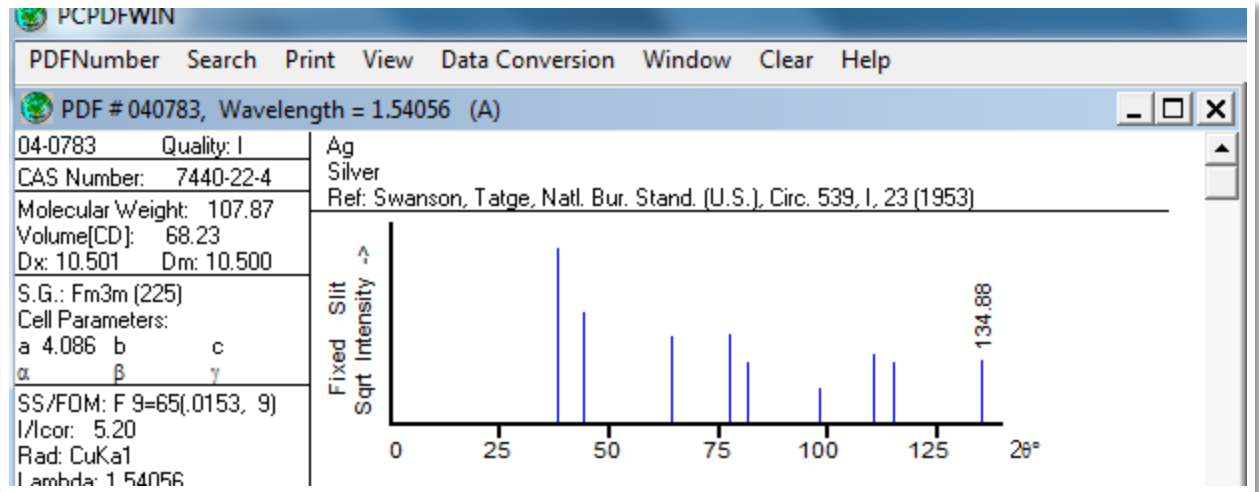

Fig 3 JCPDS data of Ag [ 04-0783 ]

### S-2 FTIR analysis

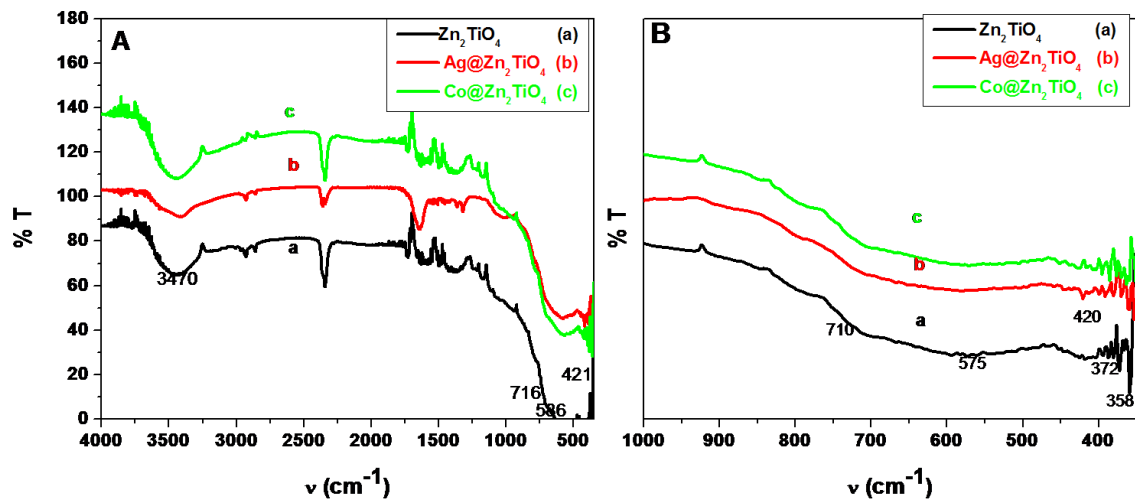

Fig : FTIR spectra of  $Zn_2TiO_4$ ,  $Ag@Zn_2TiO_4$  and  $Co@Zn_2TiO_4$  A) in the range 4000-350  $cm^{-1}$  B) magnified in the range 1000-350  $cm^{-1}$

### S-3: Elemental analyses

The elemental analysis of the synthesized compounds has been performed by Energy Dispersive X ray Fluorescence (EDXRF) analyses technique. The data given in table 1 shows that % Zn and Ti observed in all synthesized samples is in good agreement with expected values and molecular formula of the oxides.

Table : EDXRF data for elemental analyses of zinc orthotitanates

| Sr. No. | Compound                                             | Elements (%) |             |             |
|---------|------------------------------------------------------|--------------|-------------|-------------|
|         |                                                      | Zn           | Ti          | M ( Co/Ag)  |
| 01      | Zn <sub>2</sub> TiO <sub>4</sub>                     | 73.2 (73.2)  | 26.8 (26.8) | -           |
| 02      | Zn <sub>1.9</sub> Co <sub>0.1</sub> TiO <sub>4</sub> | 71.4 (69.8)  | 25.4(26.9)  | 3.3(3.3)    |
| 03      | Zn <sub>1.9</sub> Ag <sub>0.2</sub> TiO <sub>4</sub> | 64.3 (64.1)  | 24.9(24.7)  | 10. 8(11.2) |

### S-4

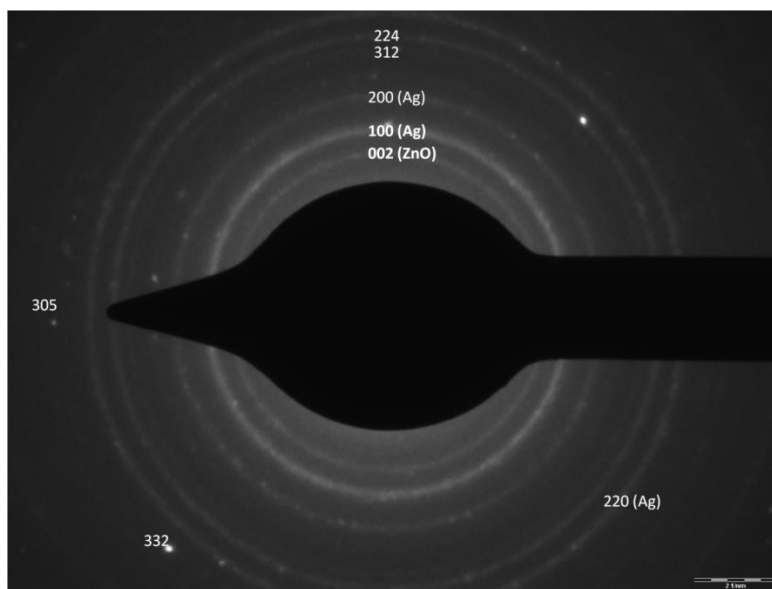

Fig. ED pattern of Ag@Zn<sub>2</sub>TiO<sub>4</sub>

S-5: Pore volume plots

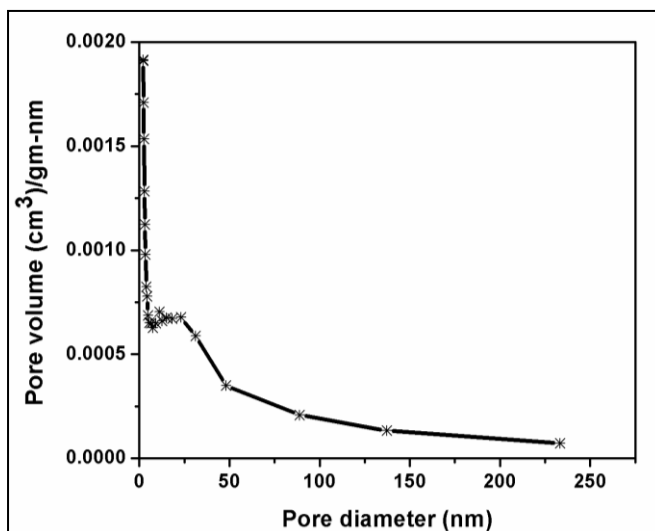

Fig.1 Pore volume plot of Zn<sub>2</sub>TiO<sub>4</sub>

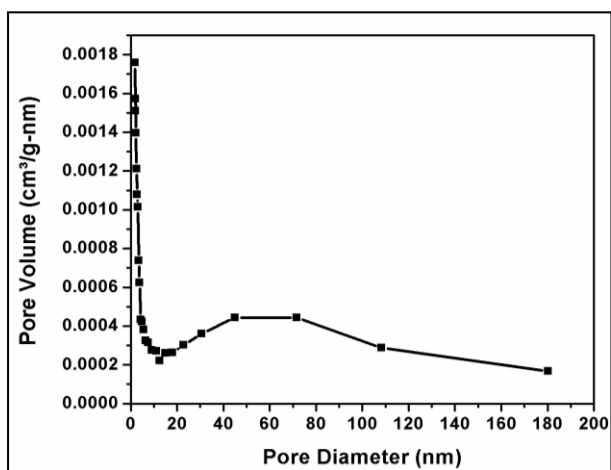

Fig.2 Pore volume plot of Ag@Zn<sub>2</sub>TiO<sub>4</sub>

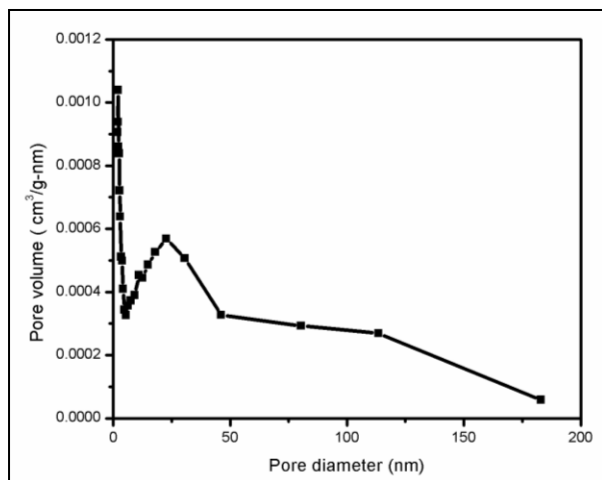

**Fig.3** Pore volume plot of Co@Zn<sub>2</sub>TiO<sub>4</sub>

S-6

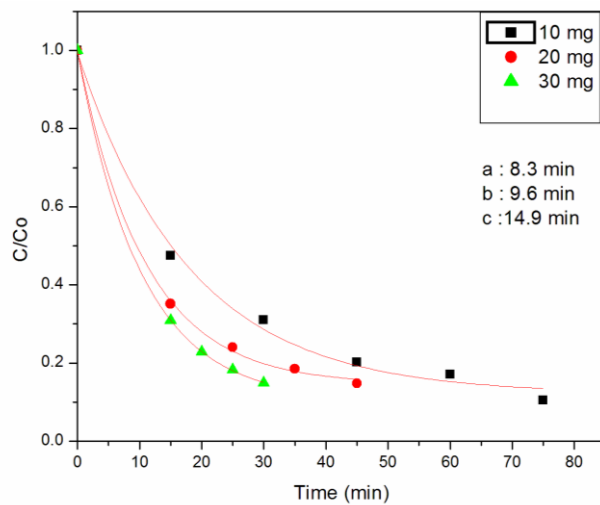

Fig. Effect of amount of  $\text{Ag@Zn}_2\text{TiO}_4$  on the rate of degradation of AO-8 a) 30 b)20 and c) 10 mg

S-7

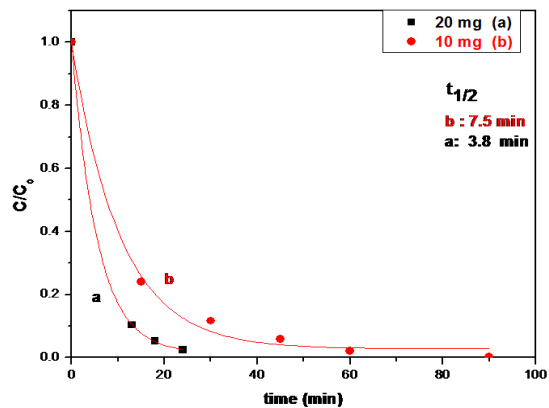

Fig. 1 Effect of concentration of catalyst for 10 and 20 mg  $\text{Ag@Zn}_2\text{TiO}_4$  for 5 ppm solution

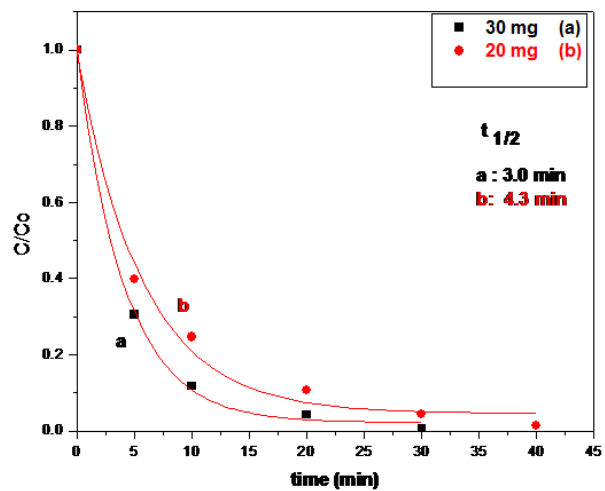

Fig. 2 Effect of amount of  $\text{Ag@Zn}_2\text{TiO}_4$  (20 and 30 mg ) catalyst for 7.5 ppm Rh-B solution.
